# Supplementary material for: Comparative kinematical analyses of Venus flytrap (Dionaea muscipula) snap traps
Source: PubMed Central journal article supplement (PMC4902084; doi:10.3762/bjnano.7.59), 2016-05-04
Supplement: Beilstein_J_Nanotechnol-07-664-s002.pdf [file Beilstein_J_Nanotechnol-07-664-s002.pdf]

**Supporting Information**  
for  
**Comparative kinematical analyses  
of Venus flytrap (*Dionaea muscipula*) snap traps**

Simon Poppinga<sup>\*1,2</sup>, Tim Kampowski<sup>1,2</sup>, Amélie Metzger<sup>1</sup>, Olga Speck<sup>1,2,3</sup>  
and Thomas Speck<sup>1,2,3</sup>

Address: <sup>1</sup>Plant Biomechanics Group, Botanic Garden, University of Freiburg, Schänzlestrasse 1, 79104 Freiburg im Breisgau, Germany; <sup>2</sup>Freiburg Materials Research Center (FMF), University of Freiburg, Stefan-Meier-Straße 21, 79104 Freiburg im Breisgau, Germany and <sup>3</sup>Freiburg Center for Interactive Materials and Bio-Inspired Technologies (FIT), Georges-Köhler-Allee 105, 79110 Freiburg im Breisgau, Germany

Email: Simon Poppinga\* - [simon.poppinga@biologie.uni-freiburg.de](mailto:simon.poppinga@biologie.uni-freiburg.de)

\*Corresponding author

**Statistical analyses for the comparative air/under water snapping experiment**

# **Descriptive statistics**

## Descriptive statistics

Whole data set

| Parameter       | Trap length (cm) | Snapping duration (s) |
|-----------------|------------------|-----------------------|
| Sample size (n) | 60               | 60                    |
| Mean            | 2.08             | 0.47                  |
| SD              | 0.49             | 0.40                  |
| Median          | 2.00             | 0.37                  |
| IQR             | 0.73             | 0.23                  |
| Min             | 1.20             | 0.17                  |
| Max             | 3.10             | 3.10                  |
| Range           | 1.90             | 2.93                  |

## Descriptive statistics

Snapping in air

| Parameter       | Trap length (cm) | Snapping duration (s) |
|-----------------|------------------|-----------------------|
| Sample size (n) | 30               | 30                    |
| Mean            | 2.13             | 0.5                   |
| SD              | 0.56             | 0.52                  |
| Median          | 2.00             | 0.36                  |
| IQR             | 0.88             | 0.23                  |
| Min             | 1.20             | 0.17                  |
| Max             | 3.10             | 3.10                  |
| Range           | 1.90             | 2.93                  |

## Descriptive statistics

Snapping under water

| Parameter       | Trap length (cm) | Snapping duration (s) |
|-----------------|------------------|-----------------------|
| Sample size (n) | 30               | 30                    |
| Mean            | 2.04             | 0.44                  |
| SD              | 0.41             | 0.25                  |
| Median          | 2.00             | 0.38                  |
| IQR             | 0.58             | 0.24                  |
| Min             | 1.40             | 0.18                  |
| Max             | 3.00             | 1.26                  |
| Range           | 1.60             | 1.08                  |

## Descriptive statistics

Snapping modes:

Mode a: synchronous lobes

Mode b: asynchronous lobes: triggered lobe moves first

Mode c: asynchronous lobes: not-triggered lobe moves first

|               | Whole data set | In air   | under water |
|---------------|----------------|----------|-------------|
| <b>Mode a</b> | 39 (65%)       | 21 (70%) | 18 (60%)    |
| <b>Mode b</b> | 12 (20%)       | 7 (23%)  | 5 (17%)     |
| <b>Mode c</b> | 9 (15%)        | 2 (7%)   | 7 (23%)     |

# Test of normal distribution

# Test of normal distribution

Whole data set (GNU R 3.1.1; Shapiro-Wilk test; *shapiro.test()*-function; *stats*-package)

Trap length

**No normal distribution**  
( $W=0.9414$ ;  $p < 0.01$ )

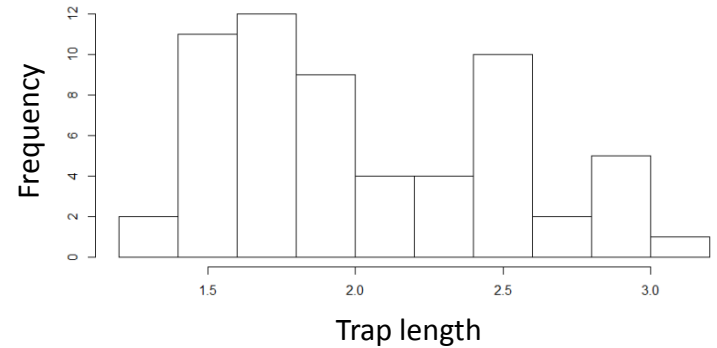

Snapping duration

**No normal distribution**  
( $W=0.5303$ ;  $p < 0.001$ )

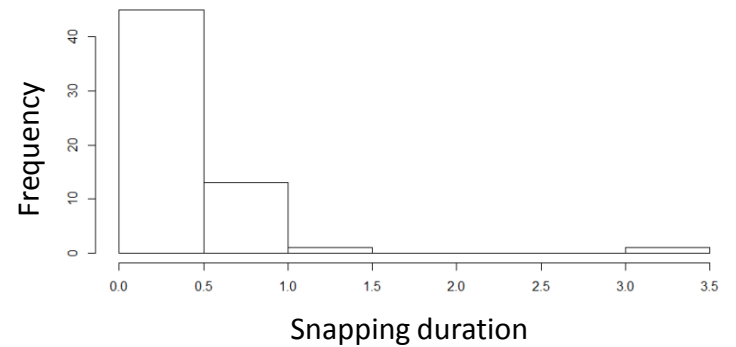



# Test of normal distribution

In air (GNU R 3.1.1; Shapiro-Wilk test; *shapiro.test()*-function; *stats*-package)

Trap length

**No normal distribution**  
( $W=0.9283$ ;  $p < 0.05$ )

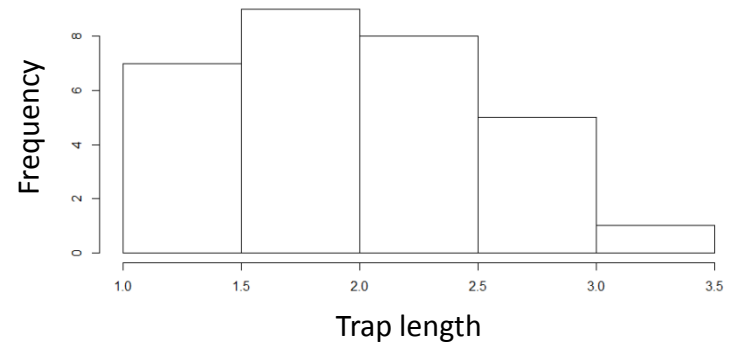

Snapping duration

**No normal distribution**  
( $W=0.4554$ ;  $p < 0.001$ )

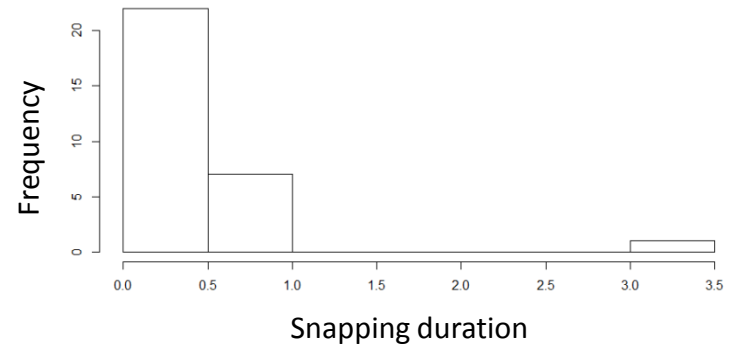

# Test of normal distribution

under water (GNU R 3.1.1; Shapiro-Wilk test; *shapiro.test()*-function; *stats*-package)

Trap length

**Normal distribution**  
( $W=0.9397$ ;  $p > 0.05$ )

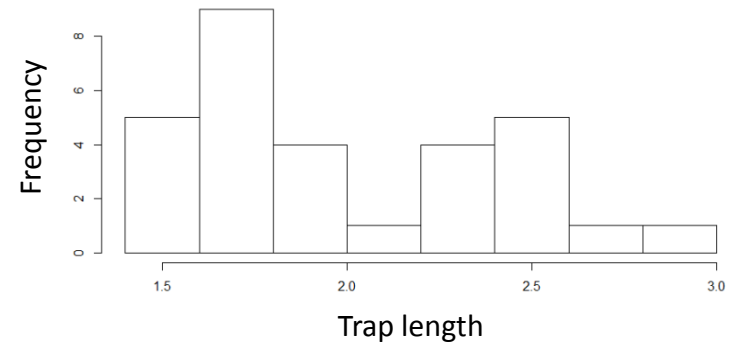

Snapping duration

**No normal distribution**  
( $W=0.8329$ ;  $p < 0.001$ )

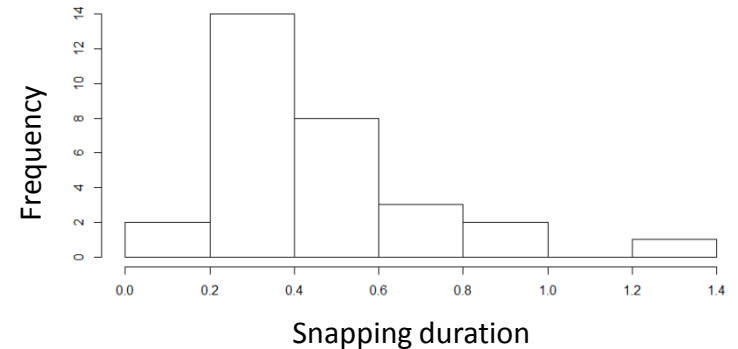

# **Test of homoscedasticity**

## Test of homoscedasticity

**Trap length** (GNU R 3.1.1; LeveneTest; *leveneTest()*-function; *car*-package)

Air vs. water

**Homoscedastic**  
( $df=[1.58]$ ;  $F=2.4848$  ;  $p > 0.05$ )

**Snapping duration** (GNU R 3.1.1; LeveneTest; *leveneTest()*-function; *car*-package)

Air vs. water

**Homoscedastic**  
( $df=[1.58]$ ;  $F=0.1542$  ;  $p > 0.05$ )

# Test of significance

# Test of significance 1 – Are the trap lengths significantly different between water and air?

GNU R 3.1.1; Wilcoxon rank sum test; `wilcox.test()`-function; stats-package

**The trap lengths are not significantly different between the surrounding media!**  
( $W=487.5$  ;  $p > 0.05$ )

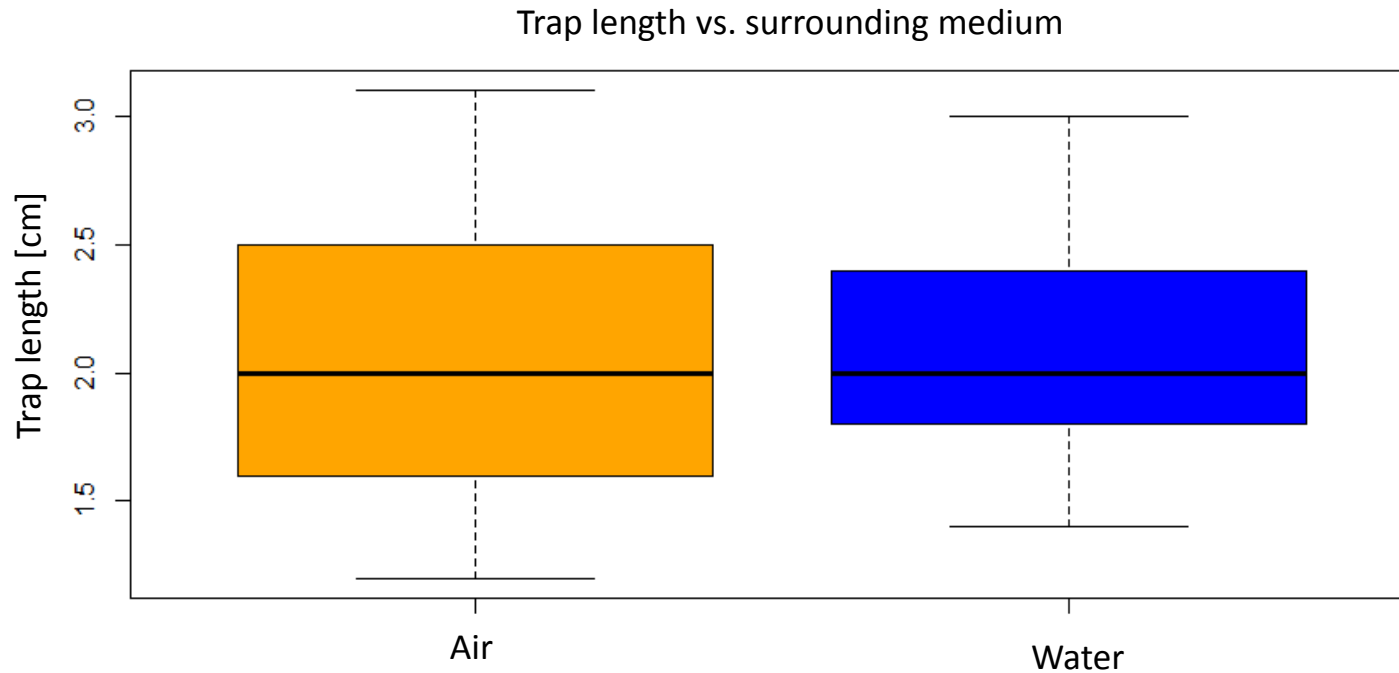

**Data can be pooled!**

## Test of significance 2 – Are the snapping durations significantly different between water and air?

GNU R 3.1.1; Wilcoxon rank sum test; `wilcox.test()`-function; stats-package

**The snapping durations are not significantly different between the surrounding media!**  
( $W=472$  ;  $p > 0.05$ )

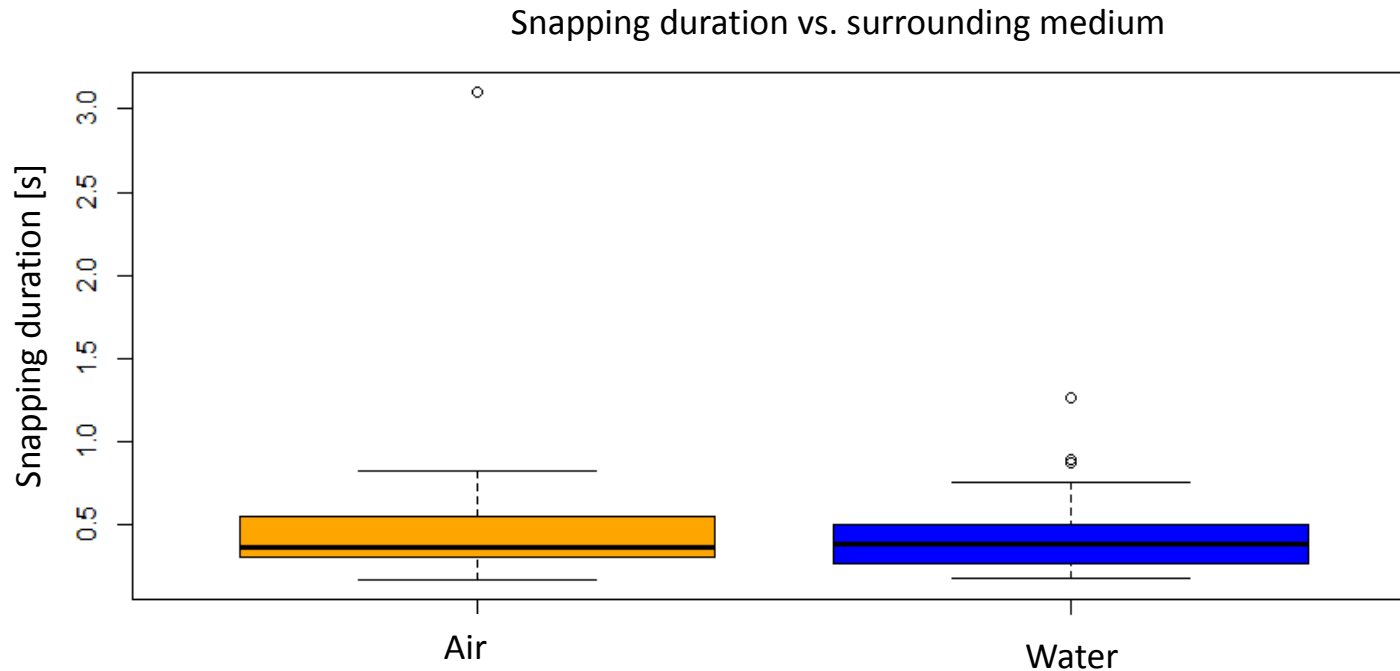

**Data can be pooled!**

# Correlation



# Correlation between trap length and snapping duration

GNU R 3.1.1; Spearman correlation ( $\rho$ ); `cor()`-function; stats-package

**The snapping durations do not correlate with the trap lengths.**  
**However, there is a weak tendency that larger traps snap faster.**  
(Spearman's  $\rho = -0.21$ )

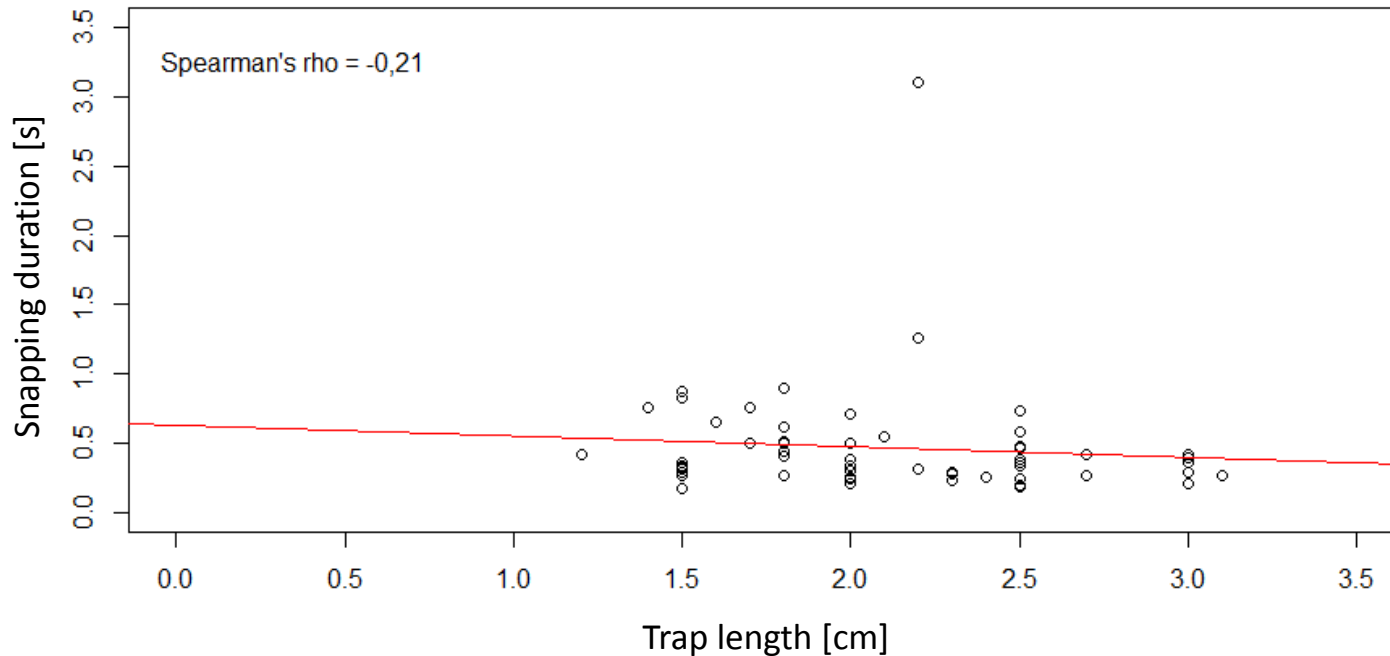

# Fisher's exact test

## Fisher's exact test – Are the snapping modes independent of the surrounding media?

GNU R 3.1.1; Fisher's exact test; `fisher.test()`-function; stats-package

| Contingency table          | In air | under water |
|----------------------------|--------|-------------|
| Synchronous lobe movement  | 21     | 18          |
| Asynchronous lobe movement | 9      | 12          |

**Snapping modes are independent of the surrounding media!**

( $p > 0.05$ )

## Used packages

- *stats*: Standard package of GNU R. ref. 1
- *car*: ref. 2
- *psych*: ref. 3

## References:

1. R Core Team (2014). R: A language and environment for statistical computing. R Foundation for Statistical Computing, Vienna, Austria. URL <http://www.R-project.org/>.
2. John Fox and Sanford Weisberg (2011). An {R} Companion to Applied Regression. Second Edition. Thousand Oaks CA: Sage. [URL:http://socserv.socsci.mcmaster.ca/jfox/Books/Companion](http://socserv.socsci.mcmaster.ca/jfox/Books/Companion)
3. Revelle. W. (2015) *psych*: Procedures for Personality and Psychological Research. Northwestern University, Evanston, Illinois, USA. <http://CRAN.R-project.org/package=psych> Version = 1.5.4.
