# Supplementary material for: Comparative kinematical analyses of Venus flytrap (Dionaea muscipula) snap traps
Source: PubMed Central journal article supplement (PMC4902084; doi:10.3762/bjnano.7.59), 2016-05-04
Supplement: Beilstein_J_Nanotechnol-07-664-s003.pdf [file Beilstein_J_Nanotechnol-07-664-s003.pdf]

**Supporting Information**  
for  
**Comparative kinematical analyses  
of Venus flytrap (*Dionaea muscipula*) snap traps**

Simon Poppinga<sup>\*1,2</sup>, Tim Kampowski<sup>1,2</sup>, Amélie Metzger<sup>1</sup>, Olga Speck<sup>1,2,3</sup>  
and Thomas Speck<sup>1,2,3</sup>

Address: <sup>1</sup>Plant Biomechanics Group, Botanic Garden, University of Freiburg,  
Schänzlestrasse 1, 79104 Freiburg im Breisgau, Germany; <sup>2</sup>Freiburg Materials Research  
Center (FMF), University of Freiburg, Stefan-Meier-Straße 21, 79104 Freiburg im Breisgau,  
Germany and <sup>3</sup>Freiburg Center for Interactive Materials and Bio-Inspired Technologies (FIT),  
Georges-Köhler-Allee 105, 79110 Freiburg im Breisgau, Germany

Email: Simon Poppinga\* - [simon.poppinga@biologie.uni-freiburg.de](mailto:simon.poppinga@biologie.uni-freiburg.de)  
\*Corresponding author

**Statistical analysis: Venus flytrap seedlings**

# **Descriptive statistics**

## Descriptive statistics

Whole data set

| Parameter       | Trap length (cm) | Snapping duration (s) |
|-----------------|------------------|-----------------------|
| Sample size (n) | 12               | 12                    |
| Mean            | 0.45             | 10.56                 |
| SD              | 0.07             | 6.50                  |
| Median          | 0.46             | 7.63                  |
| IQR             | 0.06             | 8.61                  |
| Min             | 0.31             | 4.96                  |
| Max             | 0.53             | 21.82                 |
| Range           | 0.22             | 16.86                 |

# **Test of normal distribution**

# Test of normal distribution

Whole data set (GNU R 3.1.1; Shapiro-Wilk test; *shapiro.test()*-function; *stats*-package)

Trap length

**Normal distribution**  
( $W=0.8846$ ;  $p > 0.05$ )

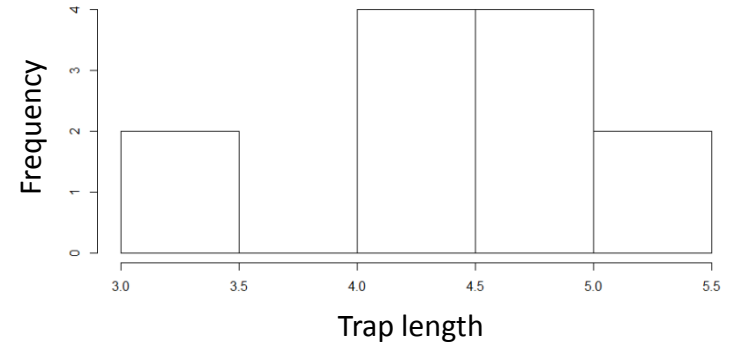

Snapping duration

**No normal distribution**  
( $W=0.7859$ ;  $p < 0.01$ )

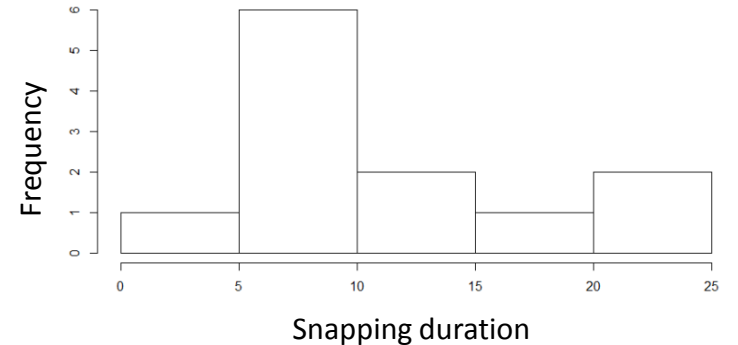

# **Test of homoscedasticity**

## Test of homoscedasticity

**Trap length** (GNU R 3.1.1; LeveneTest; *leveneTest()*-function; *car*-package)

Adult vs. seedling

**Heteroscedastic**

( $df=[1.31]$ ;  $F=15.675$  ;  $p < 0.001$ )

**Snapping duration** (GNU R 3.1.1; LeveneTest; *leveneTest()*-function; *car*-package)

Adult vs. seedling

**Not homoscedastic**

( $df=[1.31]$ ;  $F=18.951$  ;  $p < 0.001$ )

# Test of significance



# Test of significance 1 – Are trap lengths in adults and seedlings significantly different?

GNU R 3.1.1; Wilcoxon rank sum test; `wilcox.test()`-function; stats-package

**Trap lengths are highly significantly different!**

( $W=252$  ;  $p < 0.001$ )

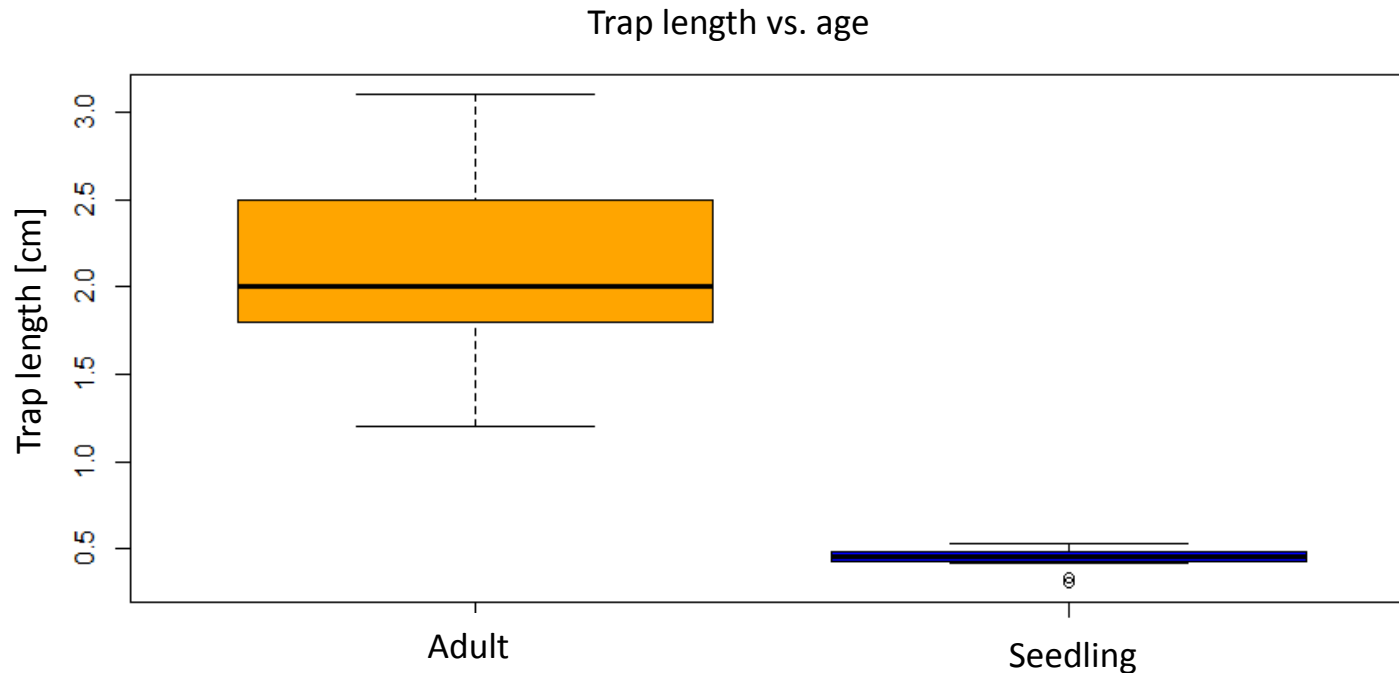

Data set of **adult traps** contains 21 traps used for the comparative air/water snapping experiment which showed synchronously moving lobes  
– see results and experimental in main text.

## Test of significance 2 – Are snapping durations in adults and seedlings significantly different?

GNU R 3.1.1; Wilcoxon rank sum test; `wilcox.test()`-function; stats-package

**Snapping durations are highly significantly different!**

( $W=0$  ;  $p < 0.001$ )

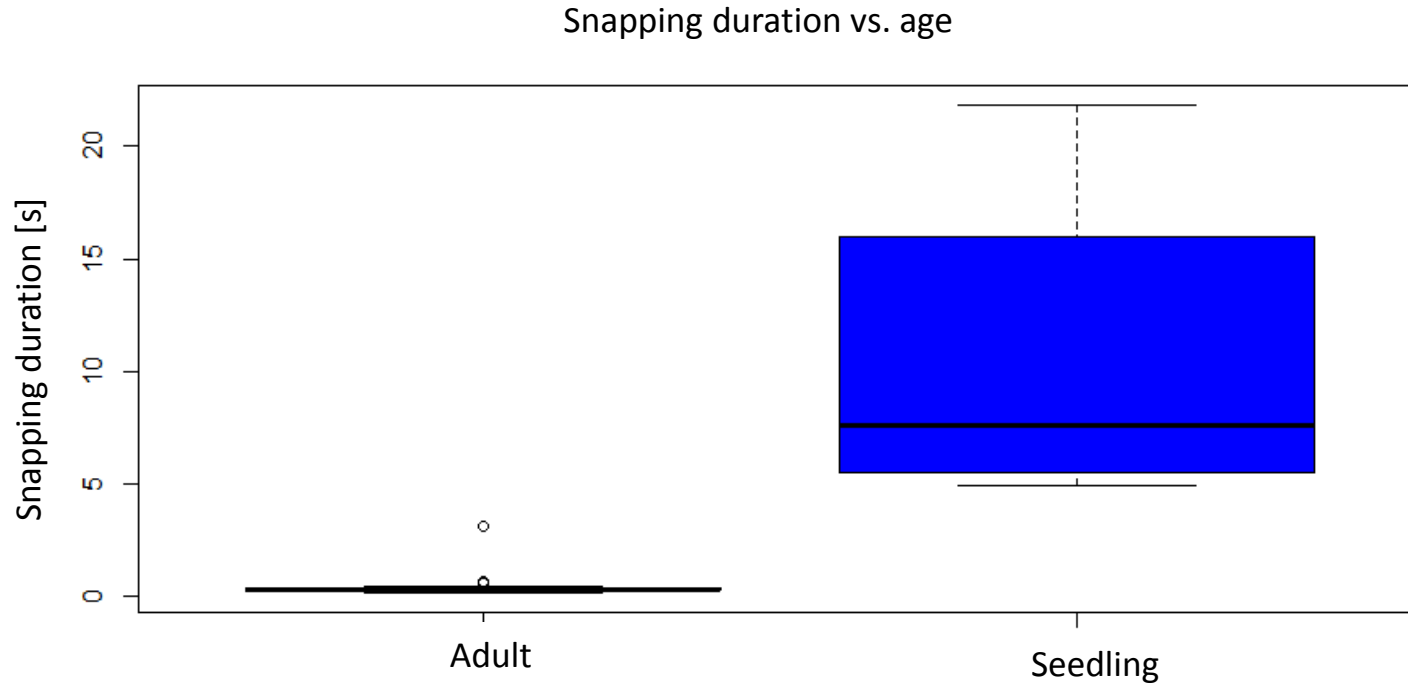

# Correlation

# Correlation between trap length and snapping duration

GNU R 3.1.1; Spearman correlation (rho); cor()-function; stats-package

**Snapping durations and trap lengths do not correlate!**

(Spearman's  $\rho = -0.11$ )

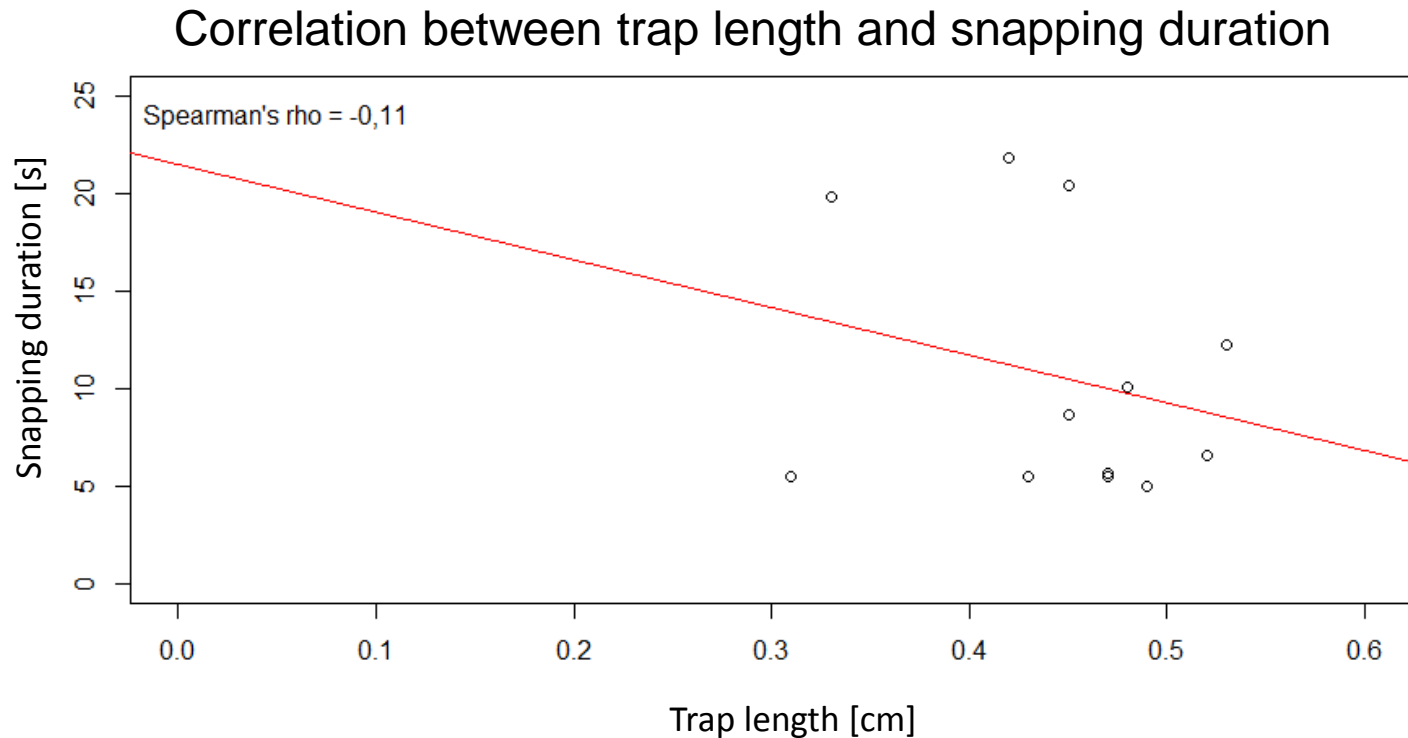

## Used packages

- *stats*: Standard package of GNU R. ref. 1
- *car*: ref. 2
- *psych*: ref. 3

## References:

1. R Core Team (2014). R: A language and environment for statistical computing. R Foundation for Statistical Computing, Vienna, Austria. URL <http://www.R-project.org/>.
2. John Fox and Sanford Weisberg (2011). An {R} Companion to Applied Regression. Second Edition. Thousand Oaks CA: Sage. [URL:http://socserv.socsci.mcmaster.ca/jfox/Books/Companion](http://socserv.socsci.mcmaster.ca/jfox/Books/Companion)
3. Revelle. W. (2015) *psych*: Procedures for Personality and Psychological Research. Northwestern University, Evanston, Illinois, USA. <http://CRAN.R-project.org/package=psych> Version = 1.5.4.
