# Supplementary material for: Comparative kinematical analyses of Venus flytrap (Dionaea muscipula) snap traps
Source: Beilstein J Nanotechnol. 2016 May 4;7:664–74. doi: 10.3762/bjnano.7.59 (PMC4902084; doi:10.3762/bjnano.7.59)
Supplement: File 1 — MS Excel file with raw data. [file Beilstein_J_Nanotechnol-07-664-s001.xlsx]

## Sheet: Air-water
IN AIR				UNDER WATER
Trap length [cm]	Snapping duration [s]	Comment		Trap length [cm]	Snapping duration [s]	Comment
2	0.38	simultaneous		2.4	0.25	simultaneous
2	0.3	simultaneous		1.8	0.41	simultaneous
2	0.34	triggered lobe first		2.5	0.24	simultaneous
1.5	0.17	triggered lobe first		2.5	0.46	triggered lobe first
1.5	0.32	triggered lobe first		1.5	0.87	triggered lobe first
1.5	0.27	simultaneous		1.8	0.61	simultaneous
3	0.42	simultaneous		2.3	0.29	un-triggered lobe first
3	0.21	simultaneous		1.8	0.89	simultaneous
3	0.36	simultaneous		1.4	0.75	simultaneous
3	0.29	simultaneous		2.3	0.23	triggered lobe first
1.2	0.42	simultaneous		2.5	0.38	simultaneous
1.5	0.31	simultaneous		2	0.24	simultaneous
1.5	0.34	simultaneous		1.5	0.29	simultaneous
2.5	0.58	triggered lobe first		3	0.39	triggered lobe first
2	0.2	simultaneous		2.2	1.26	triggered lobe first
2	0.38	simultaneous		2	0.25	simultaneous
2.5	0.34	simultaneous		2.7	0.26	un-triggered lobe first
1.5	0.82	triggered lobe first		1.8	0.5	un-triggered lobe first
1.8	0.26	simultaneous		2.5	0.18	simultaneous
2.2	3.1	simultaneous		2.5	0.19	un-triggered lobe first
1.8	0.62	simultaneous		2.3	0.28	un-triggered lobe first
2.5	0.47	simultaneous		2	0.5	simultaneous
2.5	0.73	triggered lobe first		1.8	0.51	simultaneous
1.7	0.76	un-triggered lobe first		1.5	0.36	simultaneous
2.5	0.36	simultaneous		1.5	0.26	un-triggered lobe first
2.2	0.31	simultaneous		1.7	0.5	un-triggered lobe first
2.1	0.55	un-triggered lobe first		1.8	0.27	simultaneous
2.7	0.42	triggered lobe first		1.8	0.41	simultaneous
1.6	0.65	simultaneous		1.8	0.44	simultaneous
3.1	0.27	simultaneous		2	0.71	simultaneous

## Sheet: seedling traps
Number	Medium	Length	Mode	Duration
1	L	2	a	0.38
2	L	2	a	0.3
3	L	2	b	0.34
4	L	1.5	b	0.17
5	L	1.5	b	0.32
6	L	1.5	a	0.27
7	L	3	a	0.42
8	L	3	a	0.21
Seedling No	Snapping duration [s]	Trap length [mm]	Comment
1	5.46	3.07	all traps closed simulateneously
2	5.68	4.66
3	5.51	4.33
4	8.69	4.45
5	6.57	5.15
6	10.11	4.79
7	5.51	4.74
8	4.96	4.87
9	20.42	4.49
10	19.81	3.28
11	21.82	4.18
12	12.22	5.26

## Sheet: Comparative kinematics
adult trap closing				adult trap opening					seedling trap closing					seedling trap opening
time [s]	Perimeter	Normalized distance		time [min]	Perimeter	Normalized distance			time [s]	Perimeter	Normalized distance			time [min]	Perimeter	Normalized distance
0	726.806	1		0	0.265	0.118834			0	44.652	1			0	0.226	0.0993843
0.01	726.004	0.998897		15	0.279	0.125112			0.2	43.329	0.970371			10	0.223	0.0980651
0.02	725.869	0.998711		30	0.286	0.128251			0.4	41.602	0.931694			20	0.22	0.0967458
0.03	725.803	0.99862		45	0.287	0.1287			0.6	41.055	0.919444			30	0.218	0.0958663
0.04	725.207	0.9978		60	0.289	0.129596			0.8	38.865	0.870398			40	0.227	0.0998241
0.05	724.929	0.997417		75	0.297	0.133184			1	37.836	0.847353			50	0.239	0.105101
0.06	723.684	0.995704		90	0.305	0.136771			1.2	37.14	0.831766			60	0.235	0.103342
0.07	722.897	0.994622		105	0.311	0.139462			1.4	35.98	0.805787			70	0.243	0.10686
0.08	722.781	0.994462		120	0.311	0.139462			1.6	35.18	0.787871			80	0.25	0.109938
0.09	721.895	0.993243		135	0.301	0.134978			1.8	34.193	0.765766			90	0.256	0.112577
0.1	720.848	0.991802		150	0.318	0.142601			2	33.206	0.743662			100	0.256	0.112577
0.11	720.087	0.990755		165	0.331	0.14843			2.2	31.863	0.713585			110	0.258	0.113456
0.12	719.652	0.990157		180	0.346	0.155157			2.4	30.678	0.687046			120	0.265	0.116535
0.13	718.458	0.988514		195	0.381	0.170852			2.6	30.172	0.675714			130	0.264	0.116095
0.14	716.752	0.986167		210	0.402	0.180269			2.8	29.687	0.664853			140	0.269	0.118294
0.15	716.298	0.985542		225	0.472	0.211659			3	28.816	0.645346			150	0.267	0.117414
0.16	714.624	0.983239		240	0.514	0.230493			3.2	27.837	0.623421			160	0.275	0.120932
0.17	713.383	0.981532		255	0.565	0.253363			3.4	26.603	0.595785			170	0.278	0.122252
0.18	712.321	0.98007		270	0.624	0.279821			3.6	26.129	0.58517			180	0.284	0.12489
0.19	710.179	0.977123		285	0.643	0.288341			3.8	25.97	0.581609			190	0.298	0.131047
0.2	708.982	0.975476		300	0.68	0.304933			4	25.694	0.575428			200	0.296	0.130167
0.21	707.181	0.972998		315	0.723	0.324215			4.2	24.719	0.553592			210	0.299	0.131486
0.22	705.204	0.970278		330	0.744	0.333632			4.4	24.116	0.540088			220	0.309	0.135884
0.23	703.297	0.967654		345	0.793	0.355605			4.6	23.488	0.526023			230	0.314	0.138083
0.24	701.959	0.965813		360	0.851	0.381614			4.8	23.155	0.518566			240	0.311	0.136763
0.25	699.458	0.962372		375	0.921	0.413004			5	22.873	0.51225			250	0.316	0.138962
0.26	697.805	0.960098		390	0.993	0.445291			5.2	22.599	0.506114			260	0.324	0.14248
0.27	695.397	0.956785		405	1.028	0.460987			5.4	21.682	0.485577			270	0.326	0.14336
0.28	693.59	0.954299		420	1.074	0.481614			5.6	21.015	0.47064			280	0.327	0.143799
0.29	691.555	0.951499		435	1.13	0.506726			5.8	20.79	0.465601			290	0.329	0.144679
0.3	688.925	0.94788		450	1.202	0.539013			6	20.009	0.44811			300	0.333	0.146438
0.31	685.987	0.943838		465	1.264	0.566816			6.2	19.174	0.42941			310	0.337	0.148197
0.32	683.354	0.940215		480	1.326	0.594619			6.4	18.434	0.412837			320	0.352	0.154793
0.33	680.462	0.936236		495	1.369	0.613901			6.6	17.878	0.400385			330	0.362	0.159191
0.34	677.544	0.932221		510	1.42	0.636771			6.8	17.693	0.396242			340	0.385	0.169305
0.35	674.028	0.927384		525	1.462	0.655605			7	17.566	0.393398			350	0.385	0.169305
0.36	670.503	0.922534		540	1.497	0.6713			7.2	17.303	0.387508			360	0.407	0.17898
0.37	666.1	0.916476		555	1.543	0.691928			7.4	16.635	0.372548			370	0.436	0.191733
0.38	662.693	0.911788		570	1.594	0.714798			7.6	16.45	0.368405			380	0.454	0.199648
0.39	657.471	0.904603		585	1.621	0.726906			7.8	15.308	0.342829			390	0.481	0.211522
0.4	652.084	0.897191		600	1.671	0.749327			8	14.86	0.332796			400	0.498	0.218997
0.41	645.979	0.888792		615	1.723	0.772646			8.2	14.411	0.32274			410	0.5	0.219877
0.42	639.415	0.87976		630	1.755	0.786996			8.4	14.283	0.319874			420	0.51	0.224274
0.43	632.269	0.869928		645	1.798	0.806278			8.6	13.93	0.311968			430	0.581	0.255497
0.44	613.906	0.844663		660	1.827	0.819283			8.8	13.514	0.302652			440	0.613	0.269569
0.45	595.607	0.819486		675	1.865	0.836323			9	12.793	0.286505			450	0.618	0.271768
0.46	565.23	0.77769		690	1.883	0.844395			9.2	12.573	0.281578			460	0.627	0.275726
0.47	523.773	0.72065		705	1.915	0.858744			9.4	12.042	0.269686			470	0.667	0.293316
0.48	475.669	0.654465		720	1.944	0.871749			9.6	11.932	0.267222			480	0.717	0.315303
0.49	427.905	0.588747		735	1.961	0.879372			9.8	11.533	0.258286			490	0.759	0.333773
0.5	382.449	0.526205		750	1.979	0.887444			10	11.533	0.258286			500	0.769	0.338171
0.51	325.702	0.448128		765	2.015	0.903587			10.2	11.257	0.252105			510	0.785	0.345207
0.52	277.555	0.381883		780	2.037	0.913453			10.4	10.925	0.24467			520	0.813	0.35752
0.53	245.331	0.337547		795	2.055	0.921525			10.6	10.473	0.234547			530	0.843	0.370712
0.54	216.712	0.29817		810	2.069	0.927803			10.8	9.767	0.218736			540	0.878	0.386104
0.55	191.433	0.263389		825	2.085	0.934978			11	10.1	0.226194			550	0.894	0.39314
0.56	175.192	0.241044		840	2.106	0.944395			11.2	9.691	0.217034			560	0.917	0.403254
0.57	164.439	0.226249		855	2.108	0.945291			11.4	8.796	0.19699			570	0.941	0.413808
0.58	148.889	0.204854		870	2.114	0.947982			11.6	8.497	0.190294			580	0.965	0.424362
0.59	140.822	0.193755		885	2.133	0.956502			11.8	8.24	0.184538			590	0.998	0.438874
0.6	134.577	0.185162		900	2.146	0.962332			12	7.976	0.178626			600	1.028	0.452067
0.61	125.666	0.172902		915	2.154	0.965919			12.2	7.64	0.171101			610	1.056	0.46438
0.62	115.184	0.15848		930	2.173	0.974439			12.4	7.417	0.166107			620	1.082	0.475814
				945	2.183	0.978924			12.6	6.938	0.155379			630	1.119	0.492084
				960	2.2	0.986547			12.8	6.795	0.152177			640	1.15	0.505717
				975	2.208	0.990135			13	6.149	0.137709			650	1.163	0.511434
				990	2.222	0.996413			13.2	5.966	0.133611			660	1.189	0.522867
				1005	2.227	0.998655			13.4	5.447	0.121988			670	1.229	0.540457
				1020	2.23	1			13.6	5.593	0.125258			680	1.253	0.551011
									13.8	4.972	0.11135			690	1.28	0.562885
									14	4.541	0.101698			700	1.308	0.575198
									14.2	4.36	0.097644			710	1.318	0.579595
									14.4	4.249	0.0951581			720	1.351	0.594107
									14.6	3.735	0.0836469			730	1.388	0.610378
									14.8	3.501	0.0784063			740	1.398	0.614776
									15	3.501	0.0784063			750	1.429	0.628408
														760	1.429	0.628408
														770	1.459	0.641601
														780	1.493	0.656552
														790	1.506	0.662269
														800	1.537	0.675901
														810	1.56	0.686016
														820	1.579	0.694371
														830	1.604	0.705365
														840	1.627	0.715479
														850	1.634	0.718558
														860	1.643	0.722515
														870	1.678	0.737907
														880	1.699	0.747142
														890	1.709	0.751539
														900	1.723	0.757696
														910	1.726	0.759015
														920	1.746	0.76781
														930	1.76	0.773967
														940	1.769	0.777924
														950	1.78	0.782762
														960	1.786	0.7854
														970	1.803	0.792876
														980	1.82	0.800352
														990	1.837	0.807828
														1000	1.844	0.810906
														1010	1.862	0.818821
														1020	1.863	0.819261
														1030	1.872	0.823219
														1040	1.89	0.831135
														1050	1.901	0.835972
														1060	1.908	0.83905
														1070	1.919	0.843887
														1080	1.935	0.850923
														1090	1.945	0.855321
														1100	1.962	0.862797
														1110	1.968	0.865435
														1120	1.982	0.871592
														1130	1.982	0.871592
														1140	1.989	0.87467
														1150	2.016	0.886544
														1160	2.019	0.887863
														1170	2.021	0.888742
														1180	2.039	0.896658
														1190	2.042	0.897977
														1200	2.058	0.905013
														1210	2.058	0.905013
														1220	2.065	0.908091
														1230	2.069	0.90985
														1240	2.084	0.916447
														1250	2.086	0.917326
														1260	2.096	0.921724
														1270	2.103	0.924802
														1280	2.117	0.930959
														1290	2.127	0.935356
														1300	2.141	0.941513
														1310	2.149	0.945031
														1320	2.16	0.949868
														1330	2.164	0.951627
														1340	2.17	0.954266
														1350	2.177	0.957344
														1360	2.187	0.961741
														1370	2.2	0.967458
														1380	2.204	0.969217
														1390	2.224	0.978012
														1400	2.22	0.976253
														1410	2.227	0.979332
														1420	2.23	0.980651
														1430	2.237	0.983729
														1440	2.244	0.986807
														1450	2.243	0.986368
														1460	2.243	0.986368
														1470	2.244	0.986807
														1480	2.258	0.992964
														1490	2.261	0.994283
														1500	2.26	0.993843
														1510	2.271	0.998681
														1520	2.27	0.998241
														1530	2.274	1
